# Supplementary material for: Mid-Term Clinical Outcomes of Mobile-Bearing UKA: A Retrospective Study on the Influence of Patellofemoral Joint Disease, Lower Limb Alignment, and Implant Positioning
Source: Research Square preprint supplement (doi:10.21203/rs.3.rs-8496530/v1), 2026-01-16
Supplement: Supplementary file 1 [file 7eddb239c48c9c4eb7101d58.pdf]

Screening

Assessed for eligibility:  
(n = 79 patients / 89 knees)

Excluded(n = 9)

- Did not meet medial UKA indication (n = 1)
- Secondary OA (n = 2)
- Lateral patellofemoral trochlear groove changes(n = 1)
- Imaging data incomplete / not meeting requirements(n = 5)

Allocation

Undergo UKA surgery  
(n=70 patients / 80 knees)

Follow-up

Lost to follow-up  
(n = 1)

Analysis

Analysed  
(n = 69 patients / 79 knees)
